1 **Sex differences in fear regulation and reward seeking behaviors in a fear-safety-reward**  
2 **discrimination task**

3

4

5 Abbreviated title: Sex differences in conditioned safety

6

7

8

9 Eliza M. Greiner<sup>1</sup>, Makenzie R. Norris<sup>1</sup>, Iris Müller<sup>1,2</sup>, Ka H. Ng<sup>1,2</sup>, Susan Sangha<sup>1,2\*</sup>

10

11 1. Department of Psychological Sciences

12 2. Purdue Institute for Integrative Neuroscience

13 Purdue University, West Lafayette, IN, USA 47907

14

15 \*Correspondence to:

16 Susan Sangha

17 Department of Psychological Sciences

18 Purdue University

19 703 Third St., West Lafayette, IN 47907

20 (t) 765.494.0648

21 (e) sangha@purdue.edu

22

23

24 Number of figures: 4

25 Number of tables: 1

26

27

28 **Abstract**

29 Reward availability and the potential for danger or safety potently regulates emotion. Despite  
30 women being more likely than men to develop emotion dysregulation disorders, there are  
31 comparatively few studies investigating fear, safety and reward regulation in females. Here, we  
32 show that female Long Evans rats do not suppress conditioned freezing in the presence of a  
33 safety cue, nor do they extinguish their freezing response, whereas males do both. Females  
34 were also more reward responsive during the reward cue until the first footshock exposure, at  
35 which point there were no sex differences in reward seeking to the reward cue. Darting analyses  
36 indicate females might be able to regulate this behavior in response to the safety cue,  
37 suggesting they might be able to discriminate between fear and safety cues but do not  
38 demonstrate this with conditioned suppression of the freezing behavior. However, levels of  
39 darting in this study were too low to make any clear conclusions. In summary, females showed  
40 a significantly different behavioral profile than males in a task that tests the ability to discriminate  
41 among fear, safety and reward cues. This paradigm offers a great opportunity to test for  
42 mechanisms that are generating these behavioral sex differences in learned safety and reward  
43 seeking.

44

45 **Keywords:** sex differences; fear; safety; reward

## 46 **1. Introduction**

47 Clinical disorders arising from maladaptive emotion regulation present a large burden on society  
48 worldwide. Many of these disorders show comorbidity, for example, addiction with anxiety  
49 disorders (Grant et al., 2016). Cues predicting something aversive elicit avoidance and fear  
50 behaviors whereas cues predicting reward elicit approach and reward-seeking behaviors. Cues  
51 signifying safety have the power to modulate fear and reward-seeking behaviors by informing  
52 the organism whether or not the environment is safe (Walasek, Wesierska, & Zieliński, 1995).  
53 Thus, safety, fear and reward behaviors, and the circuitries governing these behaviors, are  
54 intertwined. The majority of studies on reward and fear processing have been conducted in  
55 parallel, investigating the circuitries separately in primarily male subjects. If we hope to  
56 understand and treat comorbid disorders resulting from maladaptive emotion regulation,  
57 increased efforts in investigating how these circuitries integrate their functions to influence  
58 behavior is needed in both male and female subjects.

59  
60 Our laboratory has designed and validated a behavioral task in which fear, safety and reward  
61 cues are learned within the same session allowing us to assess the animal's ability to  
62 discriminate among these cues (Ng et al., 2018; Sangha et al., 2013; Sangha, Greba et al.,  
63 2014; Sangha, Robinson et al., 2014). Rats are exposed to cues associated with safety, fear  
64 (fear cue paired with footshock), and reward (reward cue paired with sucrose). Male rats  
65 consistently learn to discriminate among safety, fear and reward cues to 1) suppress  
66 conditioned freezing in the presence of a safety cue (fear+safety cue), and 2) increase reward  
67 seeking when reward is available (reward cue) (Ng et al., 2018; Sangha et al., 2013; Sangha,  
68 Greba, et al., 2014; Sangha, Robinson, et al., 2014). This paradigm also allows us to investigate  
69 how safety cues can regulate both fear and reward behaviors. Evidence suggests that reward  
70 learning mechanisms overlap with safety learning (Leknes et al., 2011; Pollak et al., 2008;  
71 Rescorla, 1969; Rogan et al., 2005; Sangha et al., 2013; Tanimoto et al., 2004; Walasek et al.,  
72 1995). For example, learned safety can act as a behavioral antidepressant in mice (Pollak et al.,  
73 2008), and animals will perform certain behaviors in order to turn on a safety signal (Rescorla,  
74 1969; Rogan et al., 2005). Within the amygdala we have shown a subpopulation of neurons  
75 responding with the same level of excitation or inhibition during both the reward and safety cues  
76 (Sangha et al., 2013). Additionally, we have shown inactivation of the prelimbic or infralimbic  
77 cortices of the ventromedial prefrontal cortex have differential effects on reward and safety  
78 discrimination, respectively (Sangha, Robinson, et al., 2014). Thus, in male rats, our prior work

79 has already shown a critical involvement of the corticoamygdalar circuit in learning this fear-  
80 safety-reward cue discrimination.

81  
82 Much of the research investigating emotion regulation mechanisms have exclusively used male  
83 subjects. In a study using male Vietnam veterans, PTSD patients show impairments in  
84 suppressing their fear response in the presence of a safety cue (Jovanovic et al., 2009). But,  
85 women are more than twice as likely to develop Post-Traumatic Stress Disorder (PTSD) than  
86 men, with females having a lifetime prevalence of 8.5% in contrast to 3.4% in males (McClean et  
87 al., 2011). In fear studies that have included female rats, it has been shown that females exhibit  
88 lower levels of freezing behavior than male rats after repeated fear cue presentations (Daviu et  
89 al., 2014). These findings have been thought to indicate a difficulty in fear conditioning learning  
90 in female rats. A more recent experiment has identified that approximately 40% of female rats  
91 tested exhibit an alternate fear behavior in the form of fast paced movements called 'darting';  
92 this was only seen in approximately 10% of male rats tested (Gruene et al., 2015). There is also  
93 evidence of sex differences in the seeking of natural rewards, where it has been reported that  
94 female rats consume more sucrose pellets than males and are willing to work harder for them  
95 (Tapia, Lee, Weise, Tamasi, & Will, 2019). Dopamine signaling during reward tasks has also  
96 been demonstrated to be different between sexes. For example, Conway et al (2019) showed  
97 females continue to perform intracranial self-stimulation for brain stimulation reward while under  
98 the influence of a kappa-opioid receptor agonist, which suppresses dopamine release, whereas  
99 males decrease this behavior. Their data suggest that female rats may have an increased  
100 capacity to produce and release dopamine compared to males, under these conditions. Our  
101 prior work has shown, in males, that dopamine signaling in the basolateral amygdala contributes  
102 to effective discrimination among fear, safety and reward cues (Ng et al., 2018).

103  
104 Taken together, we hypothesized there would be sex differences in the ability to express clear  
105 discrimination among fear, safety and reward cues. The inability of male PTSD patients to learn  
106 safety signaling has been labeled a biomarker of the disorder (Jovanovic et al., 2012). Due to  
107 sex-related differences in human diagnosis of PTSD, with women diagnosed at rates twice that  
108 of men (Glover et al., 2015), any differences female rats have in the learning or retention of  
109 safety signals could steer towards further research on the neurological processes underlying  
110 these variations.

## 111 **2. Materials and Methods**

### 112 *2.1 Subjects*

113 A total of 24 adult male (215-375g) and 28 adult age-matched female (198-230g) Long Evans  
114 rats (Blue Spruce; Envigo, Indianapolis), were single-housed and handled for 1 week prior to  
115 testing. All procedures were performed during the light cycle and approved by the Purdue  
116 Animal Care and Use Committee. Rats had *ad libitum* access to food and water prior to the  
117 start of the experiment. After experiment onset, they were maintained on a food restricted diet  
118 (20g per day for males; 16g per day for females) until the last day of the experiment.

119

### 120 *2.2 Apparatus*

121 The rats were trained in operant conditioning chambers consisting of Plexiglas boxes (32cm  
122 length x 25cm width x 30cm height) encased in sound-attenuating chambers (Med Associates,  
123 ST Albans, VT). 10% liquid sucrose was delivered through a recessed port 2cm above the floor  
124 in the center of one wall. Two lights (28V, 100mA) were located 10.5cm from floor on either side  
125 of the port. A light (28V, 100mA) 27cm above the floor on the wall was on throughout the entire  
126 session. Auditory cues were delivered via a speaker (ENV-224BM) located 24cm from the floor  
127 on the same wall as the port. Footshocks were delivered through a grid floor via a constant  
128 current aversive stimulator (ENV-414S). An overhead video camera and side video camera  
129 recorded the sessions for subsequent offline video scoring.

130

### 131 *2.3 Behavioral Procedures*

132 Reward pre-training (5 sessions): An auditory cue is paired with 10% sucrose solution delivery  
133 (100 $\mu$ l) and serves as the reward cue (25 trials; ITI, 90-130s).

134 Habituation (1 session): Rats continue to receive 25 reward cue-sucrose pairings (ITI, 90-130s)  
135 in addition to 5 unreinforced presentations each of the future fear and safety cues in order to  
136 habituate the rats to their presentation, thereby reducing any baseline freezing to these novel  
137 cues.

138 Discriminative conditioning (DC) (4 sessions): Reward cue-sucrose pairings continue (15 trials).  
139 Another auditory cue is paired with a mild 0.5mA, 0.5s footshock and serves as the fear cue (4  
140 trials). In separate trials the 20s fear cue is presented at the same time as a 20s safety light cue  
141 resulting in no footshock ('fear+safety', 15 trials). Trials in which the safety cue is presented  
142 alone without any footshock are also included to assess whether freezing develops to the safety  
143 cue as well as providing the animal with additional trials that contains a safety cue-no shock  
144 contingency (10 trials). Trials are presented pseudorandomly (ITI, 100-140 s). Cues were

145 counterbalanced across subjects with the caveat that the fear+safety compound cue was  
146 composed of one auditory cue and one light cue. Eight of the male rats and 12 of the female  
147 rats underwent DC training in which the reward cue was a continuous auditory cue (3 kHz, 20s  
148 cue; 70dB), the fear cue a pulsing auditory cue (11 kHz, 20s; 70dB), and the safety cue was the  
149 presentation of two lights (28V, 100mA located on both sides of the port). The remaining eight  
150 male rats and eight female rats underwent training in which the fear and safety cue stimuli were  
151 counterbalanced: the light served as the fear cue and the pulsing auditory cue served as the  
152 safety cue.

153 Extinction Training (1 session): One day after the last DC session, both the reward cue and fear  
154 cue were presented 20 times each in a pseudorandomized order without sucrose or footshock.

155 Extinction Test (1 session): One day after extinction training, rats were presented with the  
156 reward (10 trials), fear (10 trials), fear+safety (5 trials) and safety (5 trials) cues in a  
157 pseudorandomized order (ITI, 60-120s). None of the cues were presented with sucrose or  
158 footshock.

159  
160 To exclude possible sex differences in pain sensitivity and foot shock perception a separate  
161 group of male (n=8) and age-matched female (n=8) rats was presented with a series of  
162 unsignalled foot shocks of increasing intensities (0.3 mA, 0.35 mA, 0.4 mA, 0.45 mA, 0.5 mA,  
163 0.55 mA, 0.6 mA, 0.7 mA, 0.8 mA, 0.9, 1.0 mA) with an inter-stimulus interval of 2 min. The  
164 session was flanked with 5 min intervals in which no stimulus occurred.

## 165 166 *2.4 Data analyses*

167 Our experimental groups to directly compare males and females on discrimination behavior  
168 consisted of 16-20 rats. Cohorts of 4 or 8 female rats were trained alongside cohorts of 4 male  
169 rats for a total of 4 replications. Fear behavior was assessed manually offline from videos by  
170 measuring freezing, defined as complete immobility with the exception of respiratory  
171 movements, which is an innate defensive behavior (Blanchard & Blanchard, 1969; Fendt &  
172 Fanselow, 1999). The total time spent freezing during each 20s cue was quantified and  
173 expressed as a percentage. Measuring the total time the animal spent inside the reward port  
174 and at the entrance of the port with nose positioned at port entrance during each cue assessed  
175 reward seeking behavior and was expressed as a percentage. Darting behavior was detected  
176 and quantified offline from videos recorded from overhead cameras via a custom MatLab  
177 program, with movements of a velocity of 23.5cm/s or faster qualifying as a single dart (Gruene  
178 et al., 2015); these were also confirmed manually. Darting was expressed as the averaged # of

179 darts per cue (sum of darts/ # trials) or trial (sum of darts). Since there were different number of  
180 trials per reward, fear, fear+safety and safety cue in each DC session and test for extinction,  
181 this was expressed as the sum of darts across trials divided by the number of trials for each cue  
182 (sum of darts/ # trials). During extinction training, data for each individual trial is shown and the  
183 dart rate is expressed the averaged sum of darts for each individual trial (sum of darts). Three  
184 individuals performed manual offline behavioral scoring. Pearson's correlations of behavioral  
185 values between scorers were greater than  $r = 0.80$ . Behavioral data were analyzed with one-  
186 way or two-way repeated measures ANOVAs, with sex as the independent factor and condition  
187 as the repeated factor, followed by *post hoc* Sidak's, Tukey's or Dunnett's multiple comparisons  
188 tests with GraphPad Prism 8. P values were adjusted for multiple comparisons.

189

190 For shock sensitivity testing, freezing duration in the 2-min intervals between shock  
191 presentations was scored manually as an indicator of fear, as well as darting and jumping as an  
192 immediate shock response. For the freezing durations, a two-way repeated measures ANOVA  
193 was carried out via GraphPad Prism 7, with sex as the independent factor and shock intensity  
194 as the repeated factor. Darting and jumping were assessed as dichotomous variables with  
195 darting/no darting and jumping/no jumping, respectively. For both, a Cochran test was  
196 performed.

197

### 198 **3. Results**

#### 199 *3.1 Female rats spent more time reward seeking during reward pre-training*

200 All rats first underwent 5 reward pre-training sessions in which the reward cue was paired with  
201 sucrose delivery. The percent time spent at or in the reward port during each reward cue across  
202 each reward session was quantified (Figure 1b). Two-way repeated-measures ANOVAs showed  
203 main effects of session ( $F(4,136)=5.395$ ,  $p=0.0005$ ) and sex ( $F(1,34)=10.83$ ,  $p=.0023$ ), but no  
204 significant interaction ( $F(4,136)=0.9031$ ,  $p=0.4641$ ). *Post hoc* Sidak's multiple comparisons test  
205 showed females spent significantly more time reward seeking during the reward cue than males  
206 for sessions R2 ( $p=0.0274$ ), R3 ( $p=0.0151$ ) and R5 ( $p=0.0041$ ). The latency, in seconds, to  
207 enter the port post-cue onset was also calculated for each reward cue presentation across all  
208 sessions (Figure 1c). Two-way repeated-measures ANOVAs showed a main effect of sex  
209 ( $F(1,34)=20.37$ ,  $p<.0001$ ), but no significant interaction ( $F(4,136)=1.684$ ,  $p=0.1571$ ) or main  
210 effect of session ( $F(4,136)=0.7755$ ,  $p=0.5429$ ). *Post hoc* Sidak's multiple comparisons test  
211 showed females were significantly faster to enter the port than males during the last 3 reward  
212 sessions (R3,  $p=0.001$ ; R4,  $p=0.0391$ ; R5,  $p=0.0014$ ). Taken together, female rats consistently

213 spent more time than males in the reward port during the reward cue in reward pre-training  
214 sessions.

215

### 216 *3.2 Female rats did not show conditioned inhibition of freezing*

217 After reward pre-training, rats were then exposed to sessions also consisting of reward, fear and  
218 safety cues. The reward cue and sucrose reward were the same as the reward pre-training  
219 sessions. The fear cue was paired with a 0.5mA footshock, and both the safety cue and  
220 fear+safety cue did not result in footshock or sucrose.

221

222 The percent time spent at or in the reward port during each cue across session was quantified  
223 for each DC session (Figure 2b). Two-way repeated-measures ANOVAs showed a significant  
224 cue by sex effect, as well as main effects of cue and sex for DC1 (Table 1). *Post hoc* Sidak's  
225 multiple comparisons test showed that, during DC1, females spent significantly more time  
226 reward seeking during the reward cue compared to males ( $p < 0.001$ ), consistent to what was  
227 seen in reward pre-training. For the remaining DC2-4 sessions, a main effect of cue was  
228 observed (Table 1) and *post hoc* Sidak's multiple comparisons test showed that both male and  
229 female rats spent significantly more time reward seeking during the reward cue compared to all  
230 other cues ( $p < 0.0001$ ), with no significant differences between the males and females. Thus,  
231 the noticeable increase in reward seeking in the females, that was seen during reward pre-  
232 training, dissipated by the 2<sup>nd</sup> DC session.

233

234 The percent time freezing during each cue across session was quantified for each DC session  
235 (Figure 2c). Two-way repeated-measures ANOVAs showed a significant cue by sex effect for  
236 sessions DC2-4, as well as main effects of cue and sex for every session (Table 1). *Post hoc*  
237 Sidak's multiple comparisons tests showed that, for every session, females displayed  
238 significantly more freezing to the fear+safety cue compared to males (DC1,  $p = 0.0313$ ; DC2,  
239  $p = 0.007$ ; DC3,  $p = 0.0007$ ; DC4,  $p < 0.0001$ ). Females also showed significantly higher freezing  
240 levels to the fear cue compared to males during DC2 ( $p = 0.0111$ ). Males showed a significant  
241 reduction in freezing levels to the fear+safety cue compared to the fear cue during sessions  
242 DC3 ( $p = 0.0156$ ) and DC4 ( $p < 0.0001$ ), thus showing significant conditioned inhibition of freezing.  
243 Females did not show a significant inhibition of freezing during any session.

244

245 The number of darts during each cue was also quantified for each DC session and expressed  
246 as a dart rate (Figure 2d; sum of darts/ # trials). Darting behavior during cue presentation was



247 largely absent until DC3 and DC4. Two-way repeated-measures ANOVAs showed a significant  
248 cue by sex effect for DC4, as well as main effects of cue, for DC2-4, and sex, for DC1 and DC4  
249 (Table 1). *Post hoc* Sidak's multiple comparisons test showed that, during DC4, females  
250 expressed more darting behavior compared to males during both the fear cue ( $p=0.0017$ ) and  
251 the fear+safety cue ( $p=0.0186$ ). The females reduced their darting rate from 0.51 during the fear  
252 cue to 0.32 during the fear+safety cue, but this was not statistically significant.

253

### 254 3.3 Female rats did not show significant extinction of freezing

255 The day after the last DC session all rats underwent fear and reward extinction within the same  
256 session. That is, both the fear and reward cues were presented within the same training  
257 session, without footshocks or sucrose presentations.

258

259 During extinction of reward, there was no main effect of reward trial ( $F(19,646)=1.526$ ,  
260  $p=0.0704$ ) or sex ( $F(1,34)=1.31$ ,  $p=0.2603$ ) and no interaction ( $F(19,646)=0.8927$ ,  $p=0.5924$ );  
261 there was also no significant difference between male and female groups for any trial (Figure  
262 3Bi). One day later when rats were re-tested for extinction memory (Figure 3Bii), there was a  
263 main effect of cue (2-way RM ANOVA;  $F(3,102)=134.7$ ,  $p<0.0001$ ) and sex ( $F(1,34)=6.217$ ,  
264  $p=0.0177$ ). *Post hoc* Sidak's multiple comparisons test showed females had significantly more  
265 port activity than males just during the safety cue ( $p=0.0452$ ), although this difference did not  
266 reflect a large increase in port activity as females spent 6.38% +/- 0.86 of the safety cue in the  
267 port compared to 2.66% +/- 0.86 in males. Overall, there appeared to be no differences in the  
268 ability of males and females to extinguish their reward seeking responses.

269

270 To assess fear extinction the averaged percent time freezing during each trial of fear extinction  
271 training was calculated (Figure 3Ci). There was a main effect of fear trial (2-way RM ANOVA;  
272  $F(19, 646)=7.69$ ,  $p<0.0001$ ) and sex (2-way RM ANOVA;  $F(1, 34)=4.607$ ,  $p=0.0391$ ), but no  
273 significant interaction ( $F(19, 646)=1.566$ ,  $p=0.059$ ). Compared to trial 1, males showed  
274 significantly reduced freezing in extinction trials 8, 9 and 11-20 (*post hoc* Tukey's multiple  
275 comparisons test,  $p<0.05$ ), demonstrating good fear extinction beginning around the 8<sup>th</sup> trial. In  
276 contrast, females only showed a significant reduction in freezing during trial 19 compared to the  
277 first trial (*post hoc* Tukey's multiple comparisons test,  $p=0.0394$ ), demonstrating relatively  
278 absent fear extinction. One day later when rats were retested for extinction memory (Figure  
279 3Cii), there was a main effect of cue ( $F(3,102)=134.7$ ,  $p<0.0001$ ) and sex ( $F(1, 34)=6.217$ ,  
280  $p=0.0177$ ), as well as a significant interaction of cue X sex ( $F(3, 102)=3.481$ ,  $p=0.0187$ ). *Post*

281 *hoc* Sidak's multiple comparisons test showed that females froze significantly more than males  
282 to the fear ( $p=0.0146$ ) and fear+safety ( $p=0.0091$ ) cues. This indicates the continued absence of  
283 any extinction of freezing in females.

284  
285 In response to each fear cue presentation across extinction, we also assessed darting levels  
286 (Figure 3Di). There was a main effect of sex ( $F(1,34)=4.816$ ,  $p=0.0351$ ), but no effect of trial  
287 ( $F(6.957, 236.6)=0.6941$ ,  $p=0.6762$ ) and no significant interaction ( $F(19, 646)=1.083$ ,  $p=0.3640$ ).  
288 *Post hoc* Sidak's multiple comparisons test showed no significant differences between males  
289 and females for any trial. For the extinction memory test one day later (Figure 3Dii), there was a  
290 significant cue X sex interaction ( $F(3,102)=4.447$ ,  $p=0.0056$ ), as well as a main effect of both  
291 cue ( $F(2.013, 68.44)=4.248$ ,  $p=0.018$ ) and sex ( $F(1, 34)=4.834$ ,  $p=0.0348$ ). Females showed a  
292 significantly higher dart rate than males during the fear cue (*post hoc* Sidak's multiple  
293 comparisons test,  $p<0.05$ ), which was also significantly higher than the dart rate to the reward  
294 and safety cues in the females (*post hoc* Sidak's multiple comparisons test,  $p<0.05$ ). However,  
295 even though statistically significant, the amount of darting during the fear cue in females was  
296 very low (0.05-0.4 in extinction training and 0.065 in the extinction memory test), and therefore  
297 no clear conclusions can be made regarding darting and extinction in this study.

298  
299 *3.4 Shock reactivity in males versus females*

300 To exclude possible sex differences in pain sensitivity and footshock perception, a separate  
301 cohort of 8 male and 8 age-matched female rats received 11 un signaled footshocks of  
302 increasing intensities (0.3 mA, 0.35 mA, 0.4 mA, 0.45 mA, 0.5 mA, 0.55 mA, 0.6 mA, 0.7 mA,  
303 0.8 mA, 0.9, 1.0 mA) with an inter-stimulus interval of 2 min. Freezing increased as a function of  
304 shock intensities (Figure 4A; 2-way RM ANOVA;  $F(11,121)=25.9$ ,  $p<0.0001$ ). No main effects of  
305 sex ( $F(1,121)=0.2871$ ,  $p=0.6027$ ) or sex by shock ( $F(11,121)=1.413$ ,  $p=0.1754$ ) were observed.  
306 Our experiments utilized a shock intensity of 0.5mA throughout this study. For this particular  
307 intensity, we also noted the number of rats that jumped or darted in response to a 0.5mA shock  
308 (Figure 4B,C). No sex differences in the number of rats jumping in response to the 0.5mA  
309 footshock were observed ( $\chi^2$ :  $p>0.9$ ). The number of female rats darting after the 0.5mA  
310 footshock was higher than males, but not significantly ( $\chi^2$ :  $p=0.0769$ ), with five of the eight  
311 female rats tested exhibiting the behavior. A higher number of females darting in response to  
312 the footshock in this test would still not explain the lack of conditioned inhibition of freezing in  
313 the females, as freezing levels at 0.5mA was slightly lower than the males (Figure 4A). Our

314 results do not definitively show, but do suggest, that females may be more likely to respond to a  
315 footshock with a darting response.

316

#### 317 **4. Discussion**

318 In this study, we show females exhibit a significantly different behavioral profile than males in a  
319 task that tests for reward, fear and safety cue discrimination, as well as conditioned inhibition  
320 and extinction. Female Long Evans rats showed more reward seeking early in training and  
321 persistently high freezing levels to the fear cue when in the presence of a safety cue or after  
322 fear extinction. Darting behavior in the females late in training showed conditioned inhibition of  
323 this behavior in the presence of a safety cue, suggesting the females are able to discriminate  
324 between the fear and safety cues but do not suppress their freezing response. This data adds to  
325 the growing body of evidence of sex differences in fear regulation and highlights the advantages  
326 of using more complex learning paradigms with additional behavioral measurements.

327

328 Even though studies including female subjects have been proportionally low, several studies  
329 have reported clear sex differences in fear regulation. Most of these are consistent with our  
330 findings of reduced discrimination between fear and safety signals. For instance, female mice  
331 show more generalization of fear to novel and safe contexts compared to males, and with this  
332 generalization there is a concurrent increase in basal amygdala activity (Keiser et al., 2017).  
333 Male and female rats also respond differently to the controllability of a stressor. Males display  
334 reduced fear during escapable stress versus inescapable stress whereas females exhibit no  
335 beneficial effects of perceiving a stressor as escapable and controllable (Baratta et al., 2018).  
336 The buffering effects seen in these males were linked to prelimbic cortical neurons projecting to  
337 the dorsal raphe nucleus, which do not appear to be engaged in females. Females displaying a  
338 similar fear response to both inescapable and escapable stress is similar to our findings of  
339 females showing equivalent freezing levels to the fear cue in the presence or absence of a  
340 safety cue, in that there were no buffering effects seen by the safety cue. It appears that  
341 females do not downregulate their fear response in situations cued as safe.

342

343 Our data showing an increase in darting behavior in female rats as the number of fear cue-  
344 footshock trials increase is consistent with another report using female rats in a fear conditioning  
345 and extinction paradigm (Gruene et al., 2015). Like us, Gruene et al (2015) also show darting  
346 levels increase as learning about the fear cue advances. Compared to us, Gruene et al (2015)  
347 report notably higher darting frequencies, which is most likely due to the differences in shock

348 intensities and number of trials; our study used 4 trials of 0.5mA per day for 4 days compared to  
349 their study using 7 trials of 0.7mA on one day. Our study also includes reinforced reward trials  
350 within the same sessions as the fear cue-footshock trials, which could alter the contextual  
351 expectations of the training session and reduce overall darting levels. It would be interesting in  
352 future studies to identify what leads a female to become a 'darter' versus 'non-darter'. As darting  
353 is a more active response compared to freezing, the circuits engaged during potential threats  
354 would likely be different in these two populations.

355  
356 Our findings showing a lack of conditioned inhibition of freezing in females appear to be  
357 inconsistent with a recent study demonstrating a lack of sex differences in conditioned inhibition  
358 of freezing (Foilib et al., 2018). This is likely due to differences in our respective protocols. First,  
359 their footshock intensity was 1.2mA, resulting in freezing levels >90% during the fear cue. As  
360 footshock intensity and number of trials are consistently inconsistent across studies, it would be  
361 interesting to assess if freezing and darting levels in females follow a linear trend with increasing  
362 training intensity, or if there is instead a possibly U-shaped relationship. Foilib et al (2018) also  
363 used separate presentations of the fear cue and safety cue throughout training and employed  
364 the fear+safety cue summation test during recall, whereas we include fear+safety trials as part  
365 of the training. In contrast, another study has shown females discriminate equally to males early  
366 in training but then generalize their fear response to the safety cue with continued training (Day  
367 et al., 2016). While the females in our study clearly showed equivalent freezing levels to both  
368 the fear and fear+safety cues at all time points throughout training, they did not increase their  
369 freezing levels to the safety cue when presented alone. And, lastly, our paradigm, unlike others,  
370 includes reinforced reward trials during the training of fear and safety cues, which would change  
371 the context from a 'threat-no threat' situation to a 'threat-no threat-reward' situation, inducing  
372 approach behaviors on top of defensive behaviors.

373  
374 Altogether, the data paints a consistent picture of females showing heightened fear responses  
375 to cues signaling safety, mimicking the clinical picture in women (Gamwell et al., 2015; Lonsdorf  
376 et al., 2015). The presentation of a safety signal not only decreases fear, but also stimulates  
377 opposing neuronal activity. Field potential recordings in the striatum during safety signal  
378 presentation has shown that brain regions dealing with approach and reward become activated  
379 (Rogan et al., 2005). These findings have also been translated to using safety signals to  
380 overcome anhedonia in rats (Pollak et al., 2008), showing that safety signals may also be  
381 regulating emotion in addition to conditioned behavior (Foilib & Christianson, 2018).

382  
383 In our study, females consistently showed elevated reward seeking behavior during the reward  
384 cue compared to males beginning in the second reward pre-training session. This data appears  
385 consistent with reward studies showing significant sex differences in response to sucrose, with  
386 females willing to work more for sucrose in a progressive ratio paradigm (Tapia et al., 2019),  
387 and in response to drugs of abuse, with female rats consistently self-administering drugs more  
388 rapidly than males (Becker & Koob, 2016). The increased reward seeking in females seen in our  
389 study remained until the end of the first DC session at which point they were equivalent to the  
390 males. Interestingly, DC1 is the first time the animals are exposed to footshock. Taking into  
391 account the lack of conditioned inhibition of freezing in the females, the females may no longer  
392 be as motivated to seek rewards in the face of adverse footshocks. This would be consistent  
393 with the report that female rats sacrifice their metabolic needs in order to avoid shocks more  
394 than males (Pellmanet al., 2017).

395  
396 Numerous sex differences have been reported in the functioning of the stress neuropeptide,  
397 corticotropin-releasing factor (CRF), with differences in receptor expression, distribution,  
398 trafficking and signaling (reviewed in (Bangasser & Wiersielis, 2018)). The majority of these  
399 differences lead to enhanced CRF efficacy in females which may lead to heightened sensitivity  
400 to stressors in females. Recently, the gene for CRH receptor 1 (*CRHR1*) has been identified as  
401 a possible candidate gene for mood and anxiety disorders. Weber et al. (2016) have shown that  
402 carrying the *CRHR1* minor rs17689918 allele increases the risk for panic disorders in women.  
403 Patients carrying this risk allele also demonstrate more generalization of fear to a safety cue,  
404 increased amygdala activation during the safety cue and decreased frontal cortex activation with  
405 discriminative fear conditioning. Thus, aberrant CRF signaling can lead to sustained fear under  
406 conditions cued as safe and can be manifested by changes in neural activity in the amygdala  
407 and frontal cortex.

408  
409 Neural activity in the amygdala and prefrontal cortex has been shown by our lab to also play a  
410 critical role in effective discriminative conditioning in male rats. We have previously identified  
411 neurons in the basolateral amygdala (BLA) that discriminate among safety, fear and reward  
412 cues in male rats (Sangha et al., 2013); our future experiments will test if females show the  
413 same discriminative neurons. Using reversible pharmacological inactivations in male rats, we  
414 have also demonstrated that the infralimbic prefrontal cortex (IL) is necessary for suppression of  
415 conditioned fear during a safety cue and the prelimbic prefrontal cortex (PL) is necessary for

416 fear expression and discriminatory reward seeking (Sangha, Robinson, et al., 2014). These  
417 results indicate that activating the IL in the females may improve conditioned inhibition to the  
418 combined fear and safety cues. Our results with male rats also show that manipulating D1-  
419 receptor mediated dopamine activity in the BLA disrupts suppression of conditioned fear (Ng et  
420 al., 2018), implicating dopaminergic ventral tegmental area (VTA) neurons projecting to the BLA  
421 in safety-fear-reward discrimination.

422  
423 Our findings are consistent with human studies where females show less discrimination  
424 between the fear and safety signals than males (Gamwell et al., 2015; Lonsdorf et al., 2015),  
425 which may reflect underlying mechanisms of increased prevalence for anxiety and stress-  
426 related disorders in women. For example, a deficiency in effective safety signal processing has  
427 been linked to Post-traumatic Stress Disorder (Jovanovic et al., 2009, 2010), panic disorder  
428 (Gorka et al., 2014), and anxiety (Lissek et al., 2005), all disorders with a higher incidence in  
429 women than men (McClean et al., 2011). In our paradigm, females show a significantly different  
430 behavioral profile than males that is consistent with the clinical picture, thus making it a great  
431 tool to test for the neurobiological mechanisms underlying these sex differences.

432  
433 **5. Acknowledgements:**

434 We thank Yolanda Jonker, Signe Hobaugh, Jessica Kerns, Emma Speckelson, Emily Willis, and  
435 Mackenzie McIntosh for excellent animal care. IM was supported by the Alexander von  
436 Humboldt foundation. This work was supported by the National Institutes of Health [NIMH  
437 R01MH110425 to SS].

## 438 6. References

- 439 Bangasser, D. A., & Wiersielis, K. R. (2018). Sex differences in stress responses : a critical role  
440 for corticotropin-releasing factor. *Hormones*, 17(1), 5–13.
- 441 Baratta, M. V, Leslie, N. R., Fallon, I. P., Dolzani, S. D., Chun, L. E., Tamalunas, A. M., ...  
442 Maier, S. F. (2018). Behavioural and neural sequelae of stressor exposure are not  
443 modulated by controllability in females. *European Journal of Neuroscience*, 47, 959–967.  
444 <http://doi.org/10.1111/ejn.13833>
- 445 Becker, J. B., & Koob, G. F. (2016). Sex Differences in Animal Models : Focus on Addiction.  
446 *Pharmacological Reviews*, 68, 242–263.
- 447 Blanchard, R. J., & Blanchard, D. C. (1969). Crouching as an index of fear. *Journal of*  
448 *Comparative and Physiological Psychology*, 67(3), 370–5.
- 449 Christianson, J. P., Fernando, a. B. P., Kazama, a. M., Jovanovic, T., Ostroff, L. E., & Sangha,  
450 S. (2012). Inhibition of Fear by Learned Safety Signals: A Mini-Symposium Review. *Journal*  
451 *of Neuroscience*, 32(41), 14118–14124. <http://doi.org/10.1523/JNEUROSCI.3340-12.2012>
- 452 Conway, S. M., Puttick, D., Russell, S., Potter, D., Roitman, M. F., & Charto, E. H. (2019).  
453 Neuropharmacology Females are less sensitive than males to the motivational- and  
454 dopamine- suppressing effects of kappa opioid receptor activation, 146(November 2018),  
455 231–241. <http://doi.org/10.1016/j.neuropharm.2018.12.002>
- 456 Daviu, N., Andero, R., Armario, A., & Nadal, R. (2014). Sex differences in the behavioural and  
457 hypothalamic-pituitary-adrenal response to contextual fear conditioning in rats. *Hormones*  
458 *and Behavior*, 66(5), 713–723. <http://doi.org/10.1016/j.yhbeh.2014.09.015>
- 459 Day, H. L. L., Reed, M. M., & Stevenson, C. W. (2016). Sex differences in discriminating  
460 between cues predicting threat and safety. *Neurobiology of Learning and Memory*, 133,  
461 196–203. <http://doi.org/10.1016/j.nlm.2016.07.014>
- 462 Fendt, M., & Fanselow, M. S. (1999). The neuroanatomical and neurochemical basis of  
463 conditioned fear. *Neuroscience & Biobehavioral Reviews*, 23(5), 743–760.  
464 [http://doi.org/10.1016/S0149-7634\(99\)00016-0](http://doi.org/10.1016/S0149-7634(99)00016-0)
- 465 Foilb, A. R., Bals, J., Sarlitto, M. C., & Christianson, J. P. (2018). Sex differences in fear  
466 discrimination do not manifest as differences in conditioned inhibition. *Learning and*  
467 *Memory*, 25(1), 49–53. <http://doi.org/10.1101/lm.045500.117>
- 468 Foilb, A. R., & Christianson, J. P. (2018). Chapter 11 Brain Mechanisms for Learning and Using  
469 Safety Signals. In S. Sangha & D. Foti (Eds.), *Neurobiology of Abnormal Emotion and*  
470 *Motivated Behaviors: Integrating Animal and Human Research* (1st editio, pp. 205–224).  
471 Cambridge, Massachusetts: Academic Press.

- 472 Gamwell, K., Nylocks, M., Cross, D., Bradley, B., Norrholm, S. D., & Jovanovic, T. (2015). Fear  
473 Conditioned Responses and PTSD Symptoms in Children : Sex Differences in Fear-  
474 Related Symptoms. *Developmental Psychobiology*, *57*, 799–808.  
475 <http://doi.org/10.1002/dev.21313>
- 476 Glover, E. M., Jovanovic, T., & Norrholm, S. D. (2015). Estrogen and extinction of fear  
477 memories: Implications for posttraumatic stress disorder treatment. *Biological Psychiatry*,  
478 *78*(3), 178–185. <http://doi.org/10.1016/j.biopsych.2015.02.007>
- 479 Gorka, S. M., Lieberman, L., Nelson, B. D., Sarapas, C., & Shankman, S. A. (2014). Aversive  
480 responding to safety signals in panic disorder: The moderating role of intolerance of  
481 uncertainty. *Journal of Anxiety Disorders*, *28*(7), 731–736.  
482 <http://doi.org/10.1016/j.janxdis.2014.06.004>
- 483 Grant, B. F., Saha, T. D., June Ruan, W., Goldstein, R. B., Patricia Chou, S., Jung, J., ... Hasin,  
484 D. S. (2016). Epidemiology of DSM-5 drug use disorder results from the national  
485 epidemiologic survey on alcohol and related conditions-III. *JAMA Psychiatry*, *73*(1), 39–47.  
486 <http://doi.org/10.1001/jamapsychiatry.2015.2132>
- 487 Gruene, T. M., Flick, K., Stefano, A., Shea, S. D., & Shansky, R. M. (2015). Sexually divergent  
488 expression of active and passive conditioned fear responses in rats. *ELife*, *4*, 1–9.  
489 <http://doi.org/10.7554/eLife.11352>
- 490 Hernandez-Avila, C. A., Rounsaville, B. J., & Kranzler, H. R. (2004). Opioid-, cannabis- and  
491 alcohol-dependent women show more rapid progression to substance abuse treatment.  
492 *Drug and Alcohol Dependence*, *74*(3), 265–272.  
493 <http://doi.org/10.1016/j.drugalcdep.2004.02.001>
- 494 Jovanovic, T., Kazama, A., Bachevalier, J., & Davis, M. (2012). Impaired safety signal learning  
495 may be a biomarker of PTSD. *Neuropharmacology*, *62*(2), 695–704.  
496 <http://doi.org/10.1016/j.neuropharm.2011.02.023>
- 497 Jovanovic, T., Norrholm, S. D., Blanding, N. Q., Davis, M., Duncan, E., Bradley, B., & Ressler,  
498 K. J. (2010). Impaired fear inhibition is a biomarker of PTSD but not depression.  
499 *Depression and Anxiety*, *27*(3), 244–251. <http://doi.org/10.1002/da.20663>
- 500 Jovanovic, T., Norrholm, S. D., Fennell, J. E., Keyes, M., Fiallos, A. M., Myers, K. M., ...  
501 Duncan, E. J. (2009). Posttraumatic stress disorder may be associated with impaired fear  
502 inhibition: Relation to symptom severity. *Psychiatry Research*, *167*(1–2), 151–160.  
503 <http://doi.org/10.1016/j.psychres.2007.12.014>
- 504 Keiser, A. A., Turnbull, L. M., Darian, M. A., Feldman, D. E., Song, I., & Tronson, N. C. (2017).  
505 Sex Differences in Context Fear Generalization and Recruitment of Hippocampus and



- 506 Amygdala during Retrieval. *Neuropsychopharmacology*, 42(2), 397–407.  
507 <http://doi.org/10.1038/npp.2016.174>
- 508 Keyes, K. M., Grant, B. F., & Hasin, D. S. (2008). Evidence for a closing gender gap in alcohol  
509 use, abuse, and dependence in the United States population. *Drug and Alcohol*  
510 *Dependence*, 93(1–2), 21–29. <http://doi.org/10.1016/j.drugalcdep.2007.08.017>
- 511 Leknes, S., Lee, M., Berna, C., Andersson, J., & Tracey, I. (2011). Relief as a reward: Hedonic  
512 and neural responses to safety from pain. *PLoS ONE*, 6(4), e17870.  
513 <http://doi.org/10.1371/journal.pone.0017870>
- 514 Lissek, S., Powers, A. S., McClure, E. B., Phelps, E. A., Woldehawariat, G., Grillon, C., & Pine,  
515 D. S. (2005). Classical fear conditioning in the anxiety disorders: A meta-analysis.  
516 *Behaviour Research and Therapy*, 43(11), 1391–1424.  
517 <http://doi.org/10.1016/j.brat.2004.10.007>
- 518 Lonsdorf, T. . B., Haaker, J., Schümann, D., Sommer, T., Brassens, S., Bunzek, N., ... Kalisch,  
519 R. (2015). Sex differences in CS-discrimination during context-dependent fear learning and  
520 its retrieval - the role of biological sex, contraceptives and menstrual cycle phases. *Journal*  
521 *of Psychiatry and Neuroscience*, 40(6), 368–375. <http://doi.org/10.1503/jpn.140336>
- 522 Mclean, C., Asnaani, A., Litz, B., & Hofmann, S. (2011). Gender differences in anxiety disorders:  
523 Prevalence, course of illness, comorbidity and burden of illness. *Journal of Psychiatric*  
524 *Research*, 45(8), 1027–1035. <http://doi.org/10.1016/j.jpsychires.2011.03.006>. Gender
- 525 Ng, K. H., Pollock, M. W., Urbanczyk, P. J., & Sangha, S. (2018). Altering D1 receptor activity in  
526 the basolateral amygdala impairs fear suppression during a safety cue. *Neurobiology of*  
527 *Learning and Memory*, 147, 26–34. <http://doi.org/10.1016/j.nlm.2017.11.011>
- 528 Pellman, B. A., Schuessler, B. P., Tellakat, M., & Kim, J. J. (2017). Sexually Dimorphic Risk  
529 Mitigation Strategies in Rats. *Eneuro*, 4(1), e.0288-16.2017.  
530 <http://doi.org/10.1523/ENEURO.0288-16.2017>
- 531 Pollak, D. D., Monje, F. J., Zuckerman, L., Denny, C. a., Drew, M. R., & Kandel, E. R. (2008).  
532 An Animal Model of a Behavioral Intervention for Depression. *Neuron*, 60(1), 149–161.  
533 <http://doi.org/10.1016/j.neuron.2008.07.041>
- 534 Rescorla, R. A. (1969). Conditioned inhibition of fear resulting from negative CS-US  
535 contingencies. *Journal of Comparative and Physiological Psychology*, 67(4), 504–509.  
536 <http://doi.org/10.1037/h0027313>
- 537 Rogan, M. T., Leon, K. S., Perez, D. L., & Kandel, E. R. (2005). Distinct neural signatures for  
538 safety and danger in the amygdala and striatum of the mouse. *Neuron*, 46(2), 309–20.  
539 <http://doi.org/10.1016/j.neuron.2005.02.017>

- 540 Sangha, S., Chadick, J. Z., & Janak, P. H. (2013). Safety encoding in the basal amygdala. *The*  
541 *Journal of Neuroscience*, 33(9), 3744–51. [http://doi.org/10.1523/JNEUROSCI.3302-](http://doi.org/10.1523/JNEUROSCI.3302-12.2013)  
542 12.2013
- 543 Sangha, S., Greba, Q., Robinson, P. D., Ballendine, S. A., & Howland, J. G. (2014). Heightened  
544 fear in response to a safety cue and extinguished fear cue in a rat model of maternal  
545 immune activation. *Frontiers in Behavioral Neuroscience*, 8, 168.  
546 <http://doi.org/10.3389/fnbeh.2014.00168>
- 547 Sangha, S., Robinson, P. D., Greba, Q., Davies, D. A., & Howland, J. G. (2014). Alterations in  
548 reward, fear and safety cue discrimination after inactivation of the rat prelimbic and  
549 infralimbic cortices. *Neuropsychopharmacology*, 39(10), 2405–13.  
550 <http://doi.org/10.1038/npp.2014.89>
- 551 Tanimoto, H., Heisenberg, M., & Gerber, B. (2004). Event timing turns punishment to reward.  
552 *Nature*, 430, 983. <http://doi.org/10.1038/nature02816>
- 553 Tapia, M. A., Lee, J. R., Weise, V. N., Tamasi, A. M., & Will, M. J. (2019). Sex differences in  
554 hedonic and homeostatic aspects of palatable food motivation. *Behavioural Brain*  
555 *Research*, 359(November 2018), 396–400. <http://doi.org/10.1016/j.bbr.2018.11.023>
- 556 Walasek, G., Wesierska, M., & Zieliński, K. (1995). Conditioning of fear and conditioning of  
557 safety in rats. *Acta Neurobiologiae Experimentalis*, 55(2), 121–132.
- 558 Weber, H., Richter, J., Straube, B., Lueken, U., Domschke, K., Schartner, C., ... Reif, A. (2016).  
559 Allelic variation in CRHR1 predisposes to panic disorder: Evidence for biased fear  
560 processing. *Molecular Psychiatry*, 21(6), 813–822. <http://doi.org/10.1038/mp.2015.125>  
561

## 562 **7. Figure Legends**

### 563 **Figure 1. Females show increased reward seeking in response to the reward cue. A)**

564 Schematic depicting experimental outline. During reward pre-training, rats (16 males, 20  
565 females) received 25 cue-sucrose pairings across 5 separate sessions. **B)** Averaged percent  
566 time spent in the reward port during the five reward pre-training sessions (R1-5). Females spent  
567 significantly more time in the port compared to males during R2, R3 and R5. **C)** Averaged  
568 latency to enter the port after cue onset (in seconds). Females entered the port significantly  
569 sooner than males during R3-5. Means +/- SEM. \* $p < 0.05$ , \*\* $p < 0.01$ .

570

### 571 **Figure 2. Females do not show inhibition of conditioned freezing in the presence of the**

572 **safety cue. A)** Schematic depicting experimental outline. During the 4 DC sessions, rats (16  
573 males, 20 females) were presented with four types of cued trials: reward cue-sucrose, fear cue-  
574 shock, fear+safety cue with no footshock and the safety cue presented alone without footshock.  
575 **B)** Averaged percent time spent in the port during each cue across the 4 DC sessions. Both  
576 males and females showed significantly higher reward seeking during the reward cue compared  
577 to all other cues during every DC session. During DC1, females showed significantly higher  
578 reward seeking to the reward cue compared to males. **C)** Averaged percent time spent freezing  
579 during each cue across the 4 DC sessions. During DC3 and DC4, males showed significantly  
580 lower freezing to the fear+safety cue (and reward and safety cues) when compared to the fear  
581 cue. Females did not show significant inhibition of conditioned freezing to the fear+safety cue  
582 compared to the fear cue during any DC session. Females also showed significantly higher  
583 freezing to the fear+safety cue compared to males during every session. **D)** Darting behavior  
584 during each cue across the 4 DC sessions. During DC4 females showed significantly more darts  
585 than males during the fear and fear+safety cues. Means +/- SEM. #  $p < 0.05$ , ##### $p < 0.0001$   
586 within sex, between cue comparison; \*  $p < 0.05$ , \*\* $p < 0.01$ , \*\*\* $p < 0.001$ , \*\*\*\* $p < 0.0001$  within cue,  
587 between sex comparison.

588

### 589 **Figure 3. Females do not show significant extinction of fear. A)** Schematic depicting

590 experimental outline. During extinction training both the reward and fear cues are presented in  
591 the same session without sucrose or footshock. During the test for extinction memory 1 day  
592 later all cues are presented without sucrose or footshock. **Bi)** Averaged percent time spent in  
593 the port during each reward cue presentation during extinction training. No significant  
594 differences were found between males and females during extinction training. **Bii)** Averaged  
595 percent time spent in the port during each cue 1 day after extinction training. Females spent

596 significantly more time in the port than males during the safety cue. **Ci)** Averaged percent time  
597 spent freezing during each fear cue presentation during extinction training. Compared to the first  
598 trial of extinction, males showed significantly reduced freezing during trials 8, 9 and 11-20.  
599 Freezing levels for females did not significantly decrease at any point in extinction training, with  
600 the exception of trial 19. # $p < 0.05$ , compared to trial 1. **Cii)** Averaged percent time spent freezing  
601 during each cue 1 day after extinction training. Males showed evidence of fear cue extinction  
602 retention. Females froze significantly more than males during the fear and fear+safety cues. **Di)**  
603 Averaged darting during each fear cue presentation during extinction training. No significant  
604 post hoc differences found between males and females during extinction training. **Dii)** Averaged  
605 darting during each cue 1 day after extinction training. Females had a significantly higher dart  
606 rate than males during the fear cue, which was also significantly higher than the reward and  
607 safety cues in females. Means +/- SEM. # $p < 0.05$ , ##### $p < 0.0001$  within sex, between cue/trial  
608 comparisons. \* $p < 0.05$ , \*\* $p < 0.01$ , \*\*\*\* $p < 0.0001$  within cue, between sex comparisons.

609

610 **Figure 4. No significant differences in shock reactivity between age-matched male and**  
611 **female rats. A)** Male and female rats (n=8 each) were subjected to increasing footshock  
612 intensities from 0.3mA to 1.0mA. No significant differences in freezing levels (means +/- SEM)  
613 were detected between males and females after each shock presentation. The box around the  
614 data at 0.5mA indicates the intensity used for the experiments in this study. There were no  
615 significant differences in the number of males or females who jumped (**B**) or darted (**C**) in  
616 response to the 0.5mA shock.

| Reward seeking |                                         |                                                   |                                     |
|----------------|-----------------------------------------|---------------------------------------------------|-------------------------------------|
| <i>Session</i> | <i>Cue x Sex effects</i>                | <i>Main effect of cue</i>                         | <i>Main effect of sex</i>           |
| DC1            | F(3,102) = 3.472,<br><b>p=0.0189</b>    | F(3,102) = 95.16,<br><b>p&lt;0.0001</b>           | F(1,34) = 9.827,<br><b>p=0.0035</b> |
| DC2            | F(3,102) = 0.7742,<br>p=0.5110          | F(3,102) = 227.9,<br><b>p&lt;0.0001</b>           | F(1,34) = 4.69,<br><b>p=0.0374</b>  |
| DC3*           | F(3,90) = 0.6512,<br>p=0.5843           | F(3,90) = 117,<br><b>p&lt;0.0001</b>              | F(1,30)=1.041,<br>p=0.3157          |
| DC4            | F(3,102) = 2.255,<br>p=0.0864           | F(3,102) = 181.2,<br><b>p&lt;0.0001</b>           | F(1,34) = 2.453,<br>p=0.1266        |
| Freezing       |                                         |                                                   |                                     |
| <i>Session</i> | <i>Cue x Sex effects</i>                | <i>Main effect of cue</i>                         | <i>Main effect of sex</i>           |
| DC1            | F(3,102) = 2.245,<br>p=0.0876           | F(3,102) = 31.82,<br><b>p&lt;0.0001</b>           | F(1,34) = 5.045,<br><b>p=0.0313</b> |
| DC2            | F(3,102) = 4.075,<br><b>p=0.0089</b>    | F(3,102) = 103.4,<br><b>p&lt;0.0001</b>           | F(1,34) = 6.621,<br><b>p=0.0146</b> |
| DC3*           | F(3,90) = 2.9,<br><b>p=0.0393</b>       | F(3,90) = 151.3,<br><b>p&lt;0.0001</b>            | F(1,30)=9.719,<br><b>p=0.0040</b>   |
| DC4            | F(3,102) = 4.889,<br><b>p=0.0032</b>    | F(3,102) = 198.9,<br><b>p&lt;0.0001</b>           | F(1,34) = 8.294,<br><b>p=0.0068</b> |
| Darting        |                                         |                                                   |                                     |
| <i>Session</i> | <i>Cue x Sex effects</i>                | <i>Main effect of cue</i>                         | <i>Main effect of sex</i>           |
| DC1            | F(3,102) = 1.98,<br>p=0.1216            | F(2.022,68.73) =<br>2.388,<br>p=0.0989            | F(1,34) = 4.146,<br><b>p=0.0496</b> |
| DC2            | F(3,102) = 1.134,<br>p=0.3390           | F(1.923, 65.38) =<br>9.377,<br><b>p=0.0003</b>    | F(1,34) = 3.667,<br>p=0.0640        |
| DC3            | F(3,102) = 0.9158<br>p=0.4361           | F(1.586,53.93) =<br>18.96,<br><b>p&lt;0.0001</b>  | F(1,34)=0.9579,<br>p=0.3346         |
| DC4            | F(3,102) = 10.65,<br><b>p&lt;0.0001</b> | F(1.684, 57.26) =<br>15.65,<br><b>p&lt;0.0001</b> | F(1,34) = 13.34,<br><b>p=0.0009</b> |

\*video files for 4 females were corrupted for this session (n=16 females, 16 males)

Table 1. Summary of two-way repeated-measures ANOVA analyses for reward seeking, freezing and darting behaviors during the four discriminative conditioning (DC) sessions.

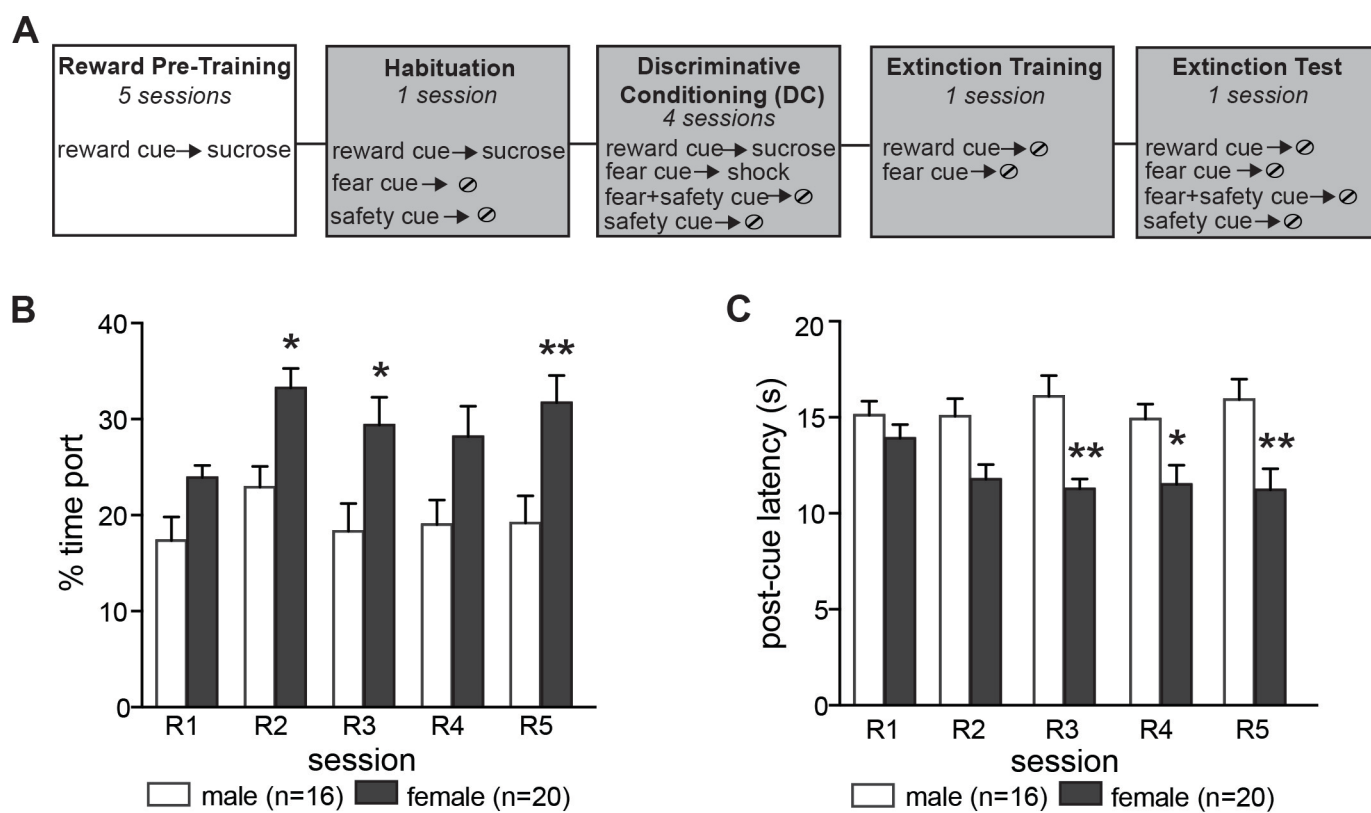

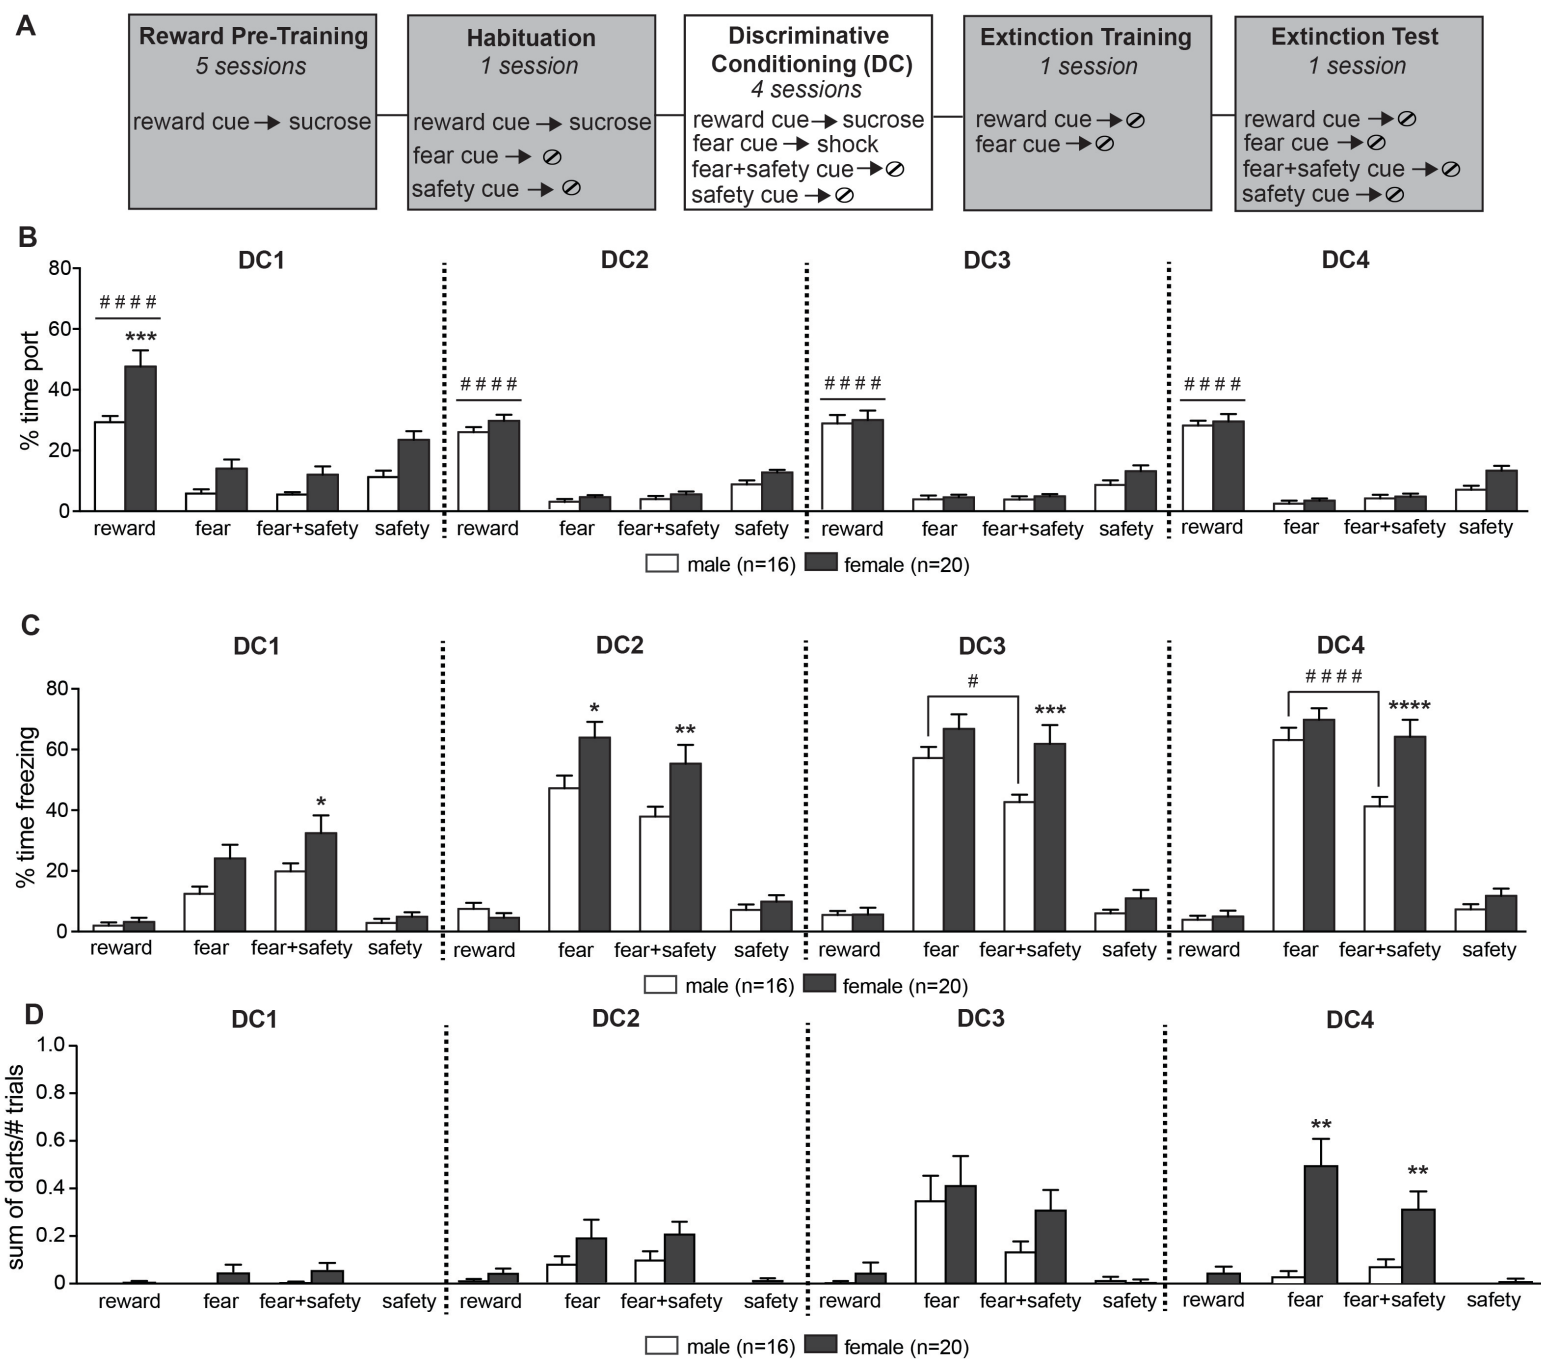

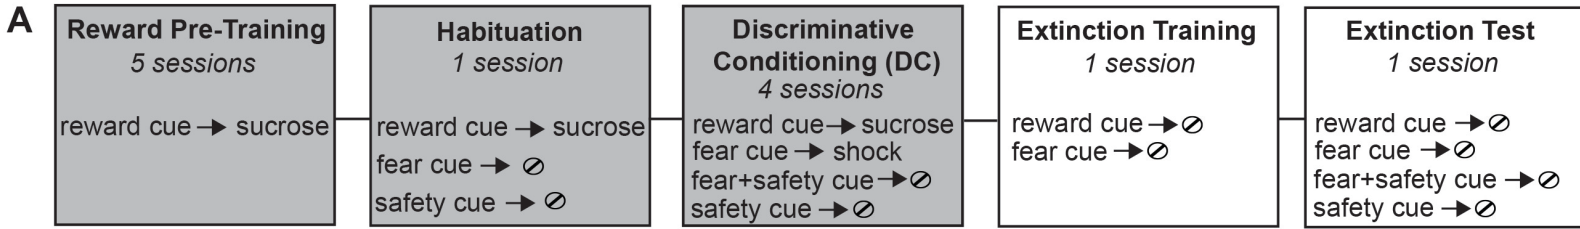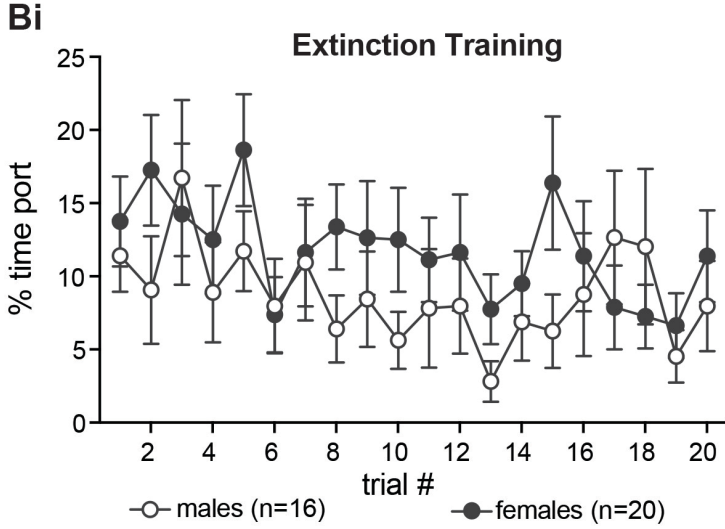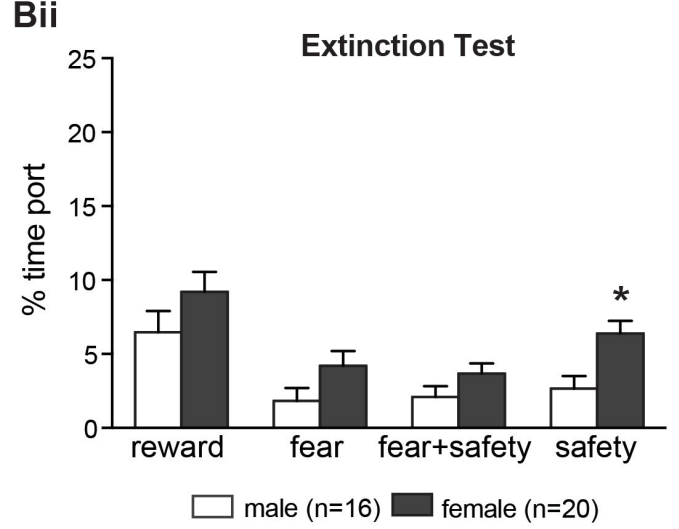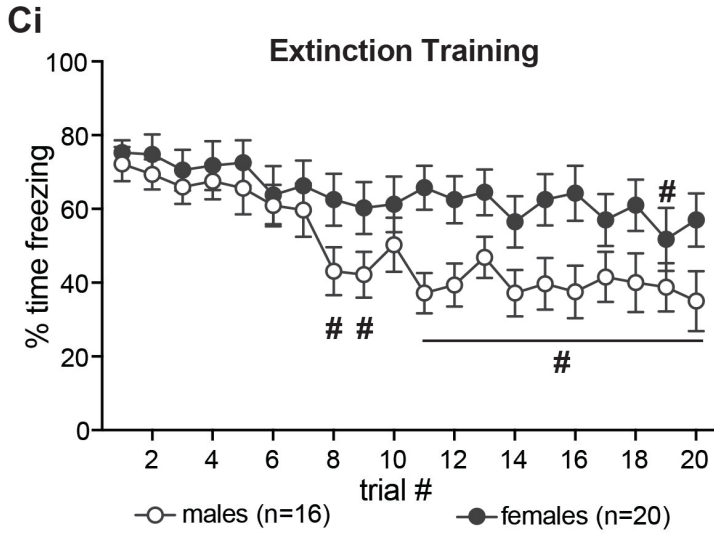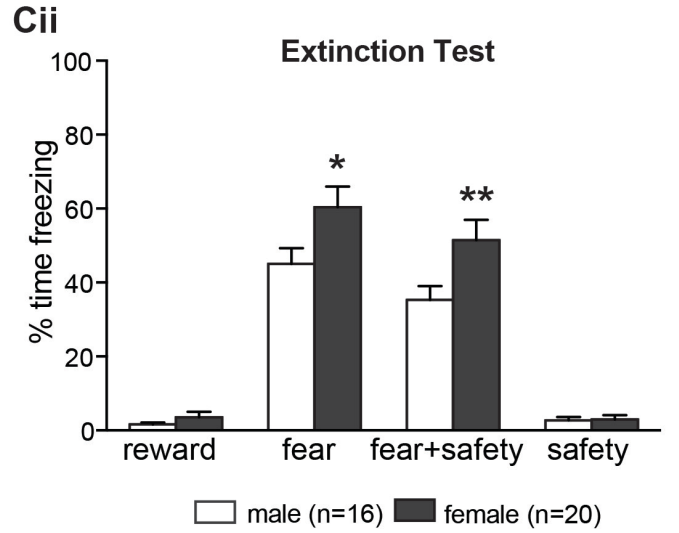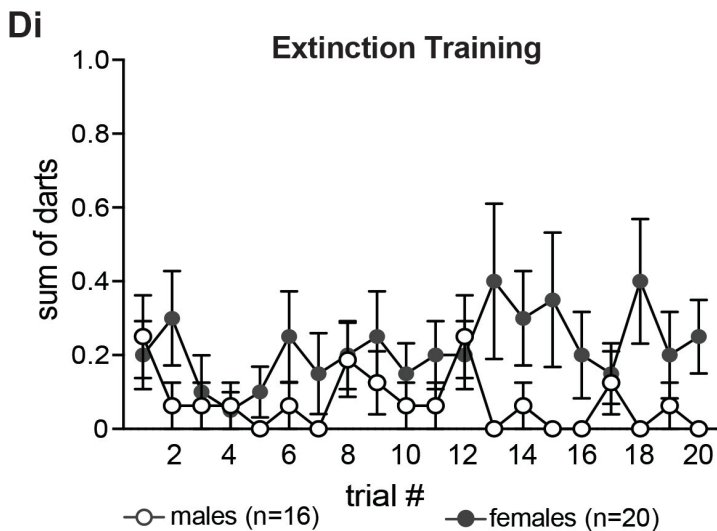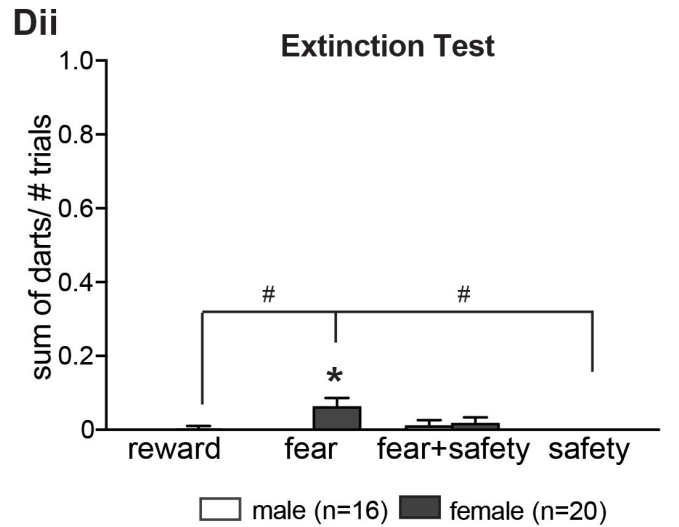



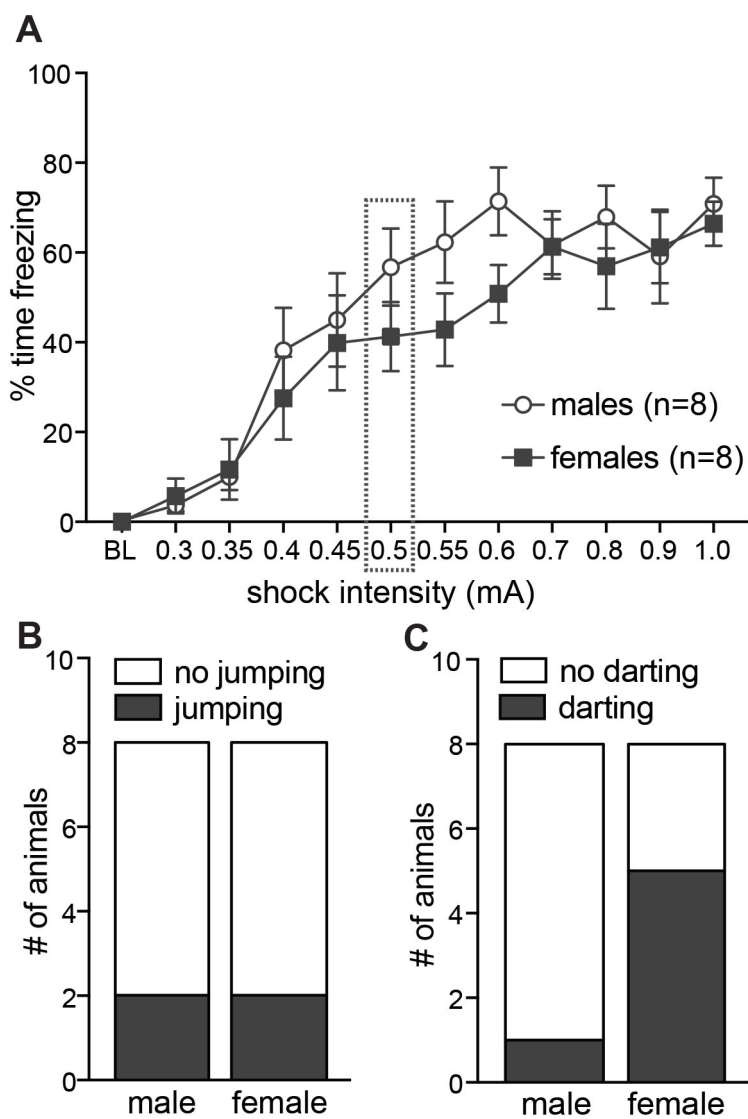

Source: http://biorxiv.org/content/10.1101/390377v2.full.pdf
